# Supplementary material
Source: PubMed Central journal article supplement (PMC4097746)
Supplement: JCM.00529-14_zjm999093544so1.pdf [file JCM.00529-14_zjm999093544so1.pdf]

**Supplemental Table 1. Pilot evaluation of the BC-GP assay for 107 aerobic and anaerobic blood cultures**

| <b>Organism</b>                  | <b>No. of isolates</b> | <b>Correct ID (%)</b> | <b>Not detected (%)</b> | <b>Incorrect ID (%)</b> |
|----------------------------------|------------------------|-----------------------|-------------------------|-------------------------|
| <b>Staphylococci</b>             | <b>84</b>              | <b>83 (98.8%)</b>     | <b>1 (1.2%)</b>         |                         |
| <i>S. aureus</i>                 | 21                     | 21 (100%)             |                         |                         |
| <i>mecA</i> -positive            | 10                     | 10 (100%)             |                         |                         |
| <i>mecA</i> -negative            | 11                     | 11 (100%)             |                         |                         |
| CoNS                             | 62                     | 61 (98.4%)            | 1 (1.6%)                |                         |
| <i>S. lugdunensis</i>            | 1                      | 1 (100%)              |                         |                         |
| <b>Enterococci</b>               | <b>6</b>               | <b>6 (100%)</b>       |                         |                         |
| <i>E. faecalis</i>               | 5                      | 5 (100%)              |                         |                         |
| <i>E. faecium</i>                | 1                      | 1 (100%)              |                         |                         |
| <i>vanA</i>                      | 1                      | 1 (100%)              |                         |                         |
| <b>Streptococci</b>              | <b>14</b>              | <b>12 (85.7%)</b>     | <b>1 (7.1%)</b>         | <b>1 (7.1%)</b>         |
| <i>S. agalactiae</i>             | 3                      | 3 (100%)              |                         |                         |
| <i>S. anginosus</i> group        | 1                      | 1 (100%)              |                         |                         |
| <i>S. dysgalactiae</i> (group G) | 1                      | 1 (100%)              |                         |                         |
| <i>S. pneumoniae</i>             | 3                      | 3 (100%)              |                         |                         |
| <i>S. pyogenes</i>               | 1                      | 1 (100%)              |                         |                         |
| viridans streptococci            | 5*                     | 3 (60%)               | 1 (20%)                 | 1 (20%)                 |
| <b>Total Detectable Targets</b>  | <b>104</b>             | <b>101 (97.1%)</b>    | <b>2 (1.9%)</b>         | <b>1 (1%)</b>           |
| <b>Other</b>                     | <b>9</b>               |                       | <b>9 (100%)</b>         |                         |
| <i>Micrococcus</i> spp.          | 5                      |                       | 5 (100%)                |                         |
| <i>Rothia mucilaginosa</i>       | 1                      |                       | 1 (100%)                |                         |
| <i>Clostridium</i> sp.           | 1                      |                       | 1 (100%)                |                         |
| <i>Enterobacter cloacae</i>      | 1                      |                       | 1 (100%)                |                         |
| saprophytic <i>Neisseria</i> sp. | 1                      |                       | 1 (100%)                |                         |
| <b>Overall</b>                   | <b>113</b>             | <b>110 (97.3%)</b>    |                         | <b>3 (2.7%)</b>         |

There were 102 monomicrobial and 5 polymicrobial cultures included in this portion of the study. Asterisks (\*) indicates a polymicrobial culture in which *S. pneumoniae* and viridans streptococci were isolated.
